# Supplementary material for: Neurons innervating both the central amygdala and the ventral tegmental area encode different emotional valences
Source: Frontiers journal article supplement (doi:10.3389/fnins.2023.1178693), 2023-05-05
Supplement: Presentation_1.pdf [file Presentation_1.pdf]

### **Supplementary Figure S1. The projection of GFP-positive neurons to the CeA and the VTA**

The GFP-labeled axons in the CeA (A) and VTA (B). Scale bars: 100  $\mu$ m.

### **Supplementary Figure S2. The methodological validity for using the IS reporter mice**

(A-F) CeA-projecting tdTomato-positive neurons in the mPFC (A), the IC (B), the alBNST (C), the PVT (D), the VMH (E), and the DR (F). Scale bars: 100  $\mu$ m. (G, H) The GFP-positive neurons and tdTomato-positive neurons in the LPB. Scale bars: 100  $\mu$ m.

### **Supplementary Figure S3. Activation of BMA neurons innervating the CeA and the VTA has no effect on conditioned place testing and anxiety-like behavior**

(A) A schematic diagram of the viral injection and fiber implantation sites. (B) Percent changes in the occupancy time on the stimulation side after conditioning (after conditioning - before conditioning) ( $n = 6$  mice for each group). (C) Experimental procedure for intermittent optogenetic activation of ChR2-expressing neurons in the open field test. (D, E) Optogenetic activation of ChR2-expressing neurons in the BMA did not affect the time mice spent in the center zone and locomotor activity of mice in the open field test ( $n = 5$  mice for each group). (F) Experimental procedure for intermittent optogenetic activation of ChR2-expressing neurons in the elevated plus maze test. (G, H) Optogenetic activation of ChR2-expressing neurons in the BMA did not affect the time mice spent in the open arms and locomotor activity of mice in the elevated plus maze test ( $n = 5$  mice for each group). Data are presented as mean  $\pm$  SEM.

### **Supplementary Figure S4. The types of neurons that innervate the CeA and the VTA (excitatory vs. inhibitory)**

(A) Expression of *GFP*, *Vglut2*, and *Vgat* mRNAs with smFISH in the pBNST. Scale bars: 50  $\mu$ m. 24.1%  $\pm$  1.8% and 67.7%  $\pm$  1.7% of GFP-positive neurons in the pBNST expressed *Vglut2* and *Vgat*, respectively ( $n = 3$  mice). (B) Expression of *GFP*, *Vglut2*, and *Vgat* mRNAs with smFISH in the BMA. Scale bars: 50  $\mu$ m. 56.1%  $\pm$  1.5% and 34.9%  $\pm$  3.0% of GFP-positive neurons in the BMA expressed *Vglut2* and *Vgat*, respectively ( $n = 3$  mice). (C) Expression of *GFP*, *Vglut2*, and *Vgat* mRNAs with smFISH in the PPTg. Scale bars: 50  $\mu$ m. 92.5%  $\pm$  1.2% and 5.5%  $\pm$  0.5% of GFP-positive neurons in the PPTg expressed *Vglut2* and *Vgat*, respectively ( $n = 3$  mice). Data are presented as mean  $\pm$  SEM.
